# Supplementary material for: Proteome Profiling of Exosomes Purified from a Small Amount of Human Serum: The Problem of Co-Purified Serum Components
Source: MDPI journal article supplement (doi:10.3390/proteomes7020018), 2019-04-28
Supplement: s1 [file s1]

# **Proteome profiling of exosomes purified from a small amount of human serum: the problem of co-purified serum components.**

Mateusz Smolarz et al.

**Supplementary Material Figure S1.**

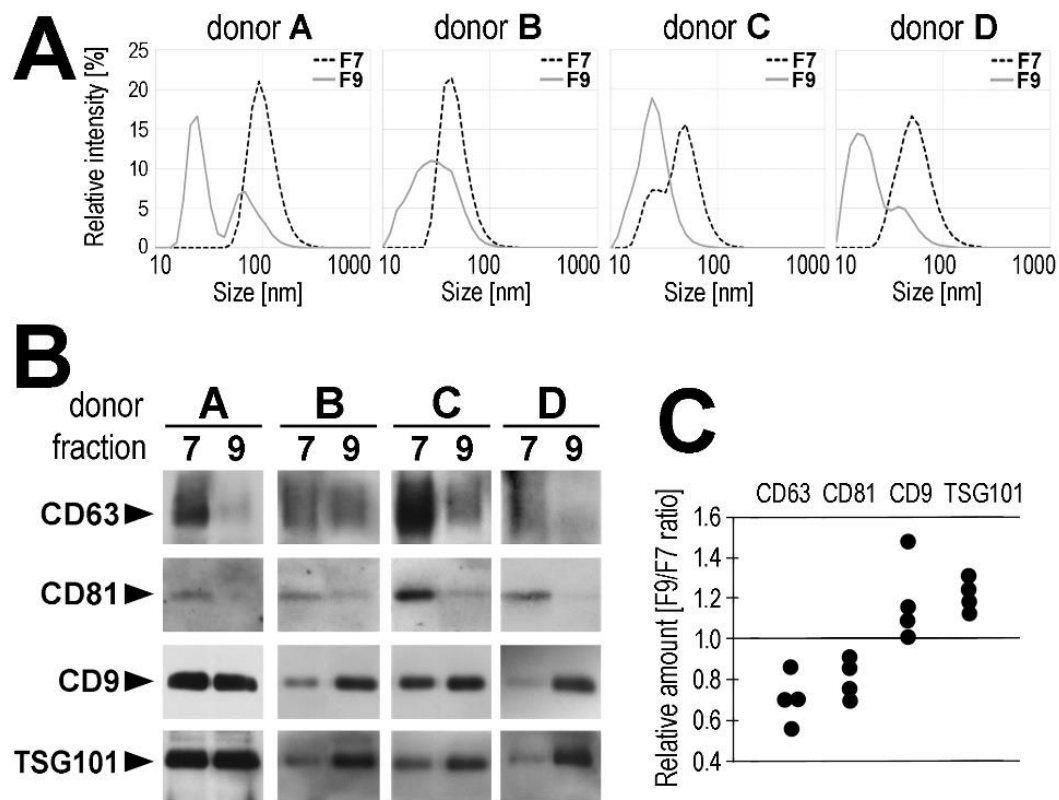

**Supplementary Figure S1.** Characteristics of vesicles purified from serum of four different donors. **Panel A** – Size of vesicles measured by DLS in fractions F7 and F9. **Panel B** – Level of selected exosome proteins analyzed by Western-blot in fractions F7 and F9; the same amount of total proteins (0.2 µg) was used for both fraction. **Panel C** – Relative amount of selected proteins in both fractions (the F9/F7 ratio); each donor is represented by a dot.
